# Supplementary material for: Development of a novel Eu2+ activated oxonitridosilicate cyan phosphor for enhancing the color quality of a violet-chip-based white LED
Source: Royal Society of Chemistry journal article supplement (doi:10.1039/d3dt04188c), 2024-01-01
Supplement: d3dt04188c1.pdf [file d3dt04188c1.pdf]

## Supporting information

### Development of a novel $\text{Eu}^{2+}$ activated oxonitridosilicate cyan phosphor for enhancing the color quality of violet-chip-based white LED

Langping Dong,<sup>a,\*</sup> Jinqing Gao,<sup>a</sup> Yijia Guo,<sup>a</sup> Jingshan Hou,<sup>a,\*</sup> Baiqi Shao,<sup>b</sup> and Yongzheng  
Fang<sup>a,\*</sup>

<sup>a</sup> School of Materials Science and Engineering, Shanghai Institute of Technology, Shanghai,  
201418, China.

<sup>b</sup> Joint Centre of Translation Medicine, Wenzhou Institute, University of Chinese Academy of  
Sciences, Wenzhou, Zhejiang 325000, P.R. China.

\* Corresponding author. E-mail address: [lpdong@sit.edu.cn](mailto:lpdong@sit.edu.cn) (L. D.);  
[hujingshan@hotmail.com](mailto:hujingshan@hotmail.com) (J. H.); [fyz1003@sina.com](mailto:fyz1003@sina.com) (Y. F.).

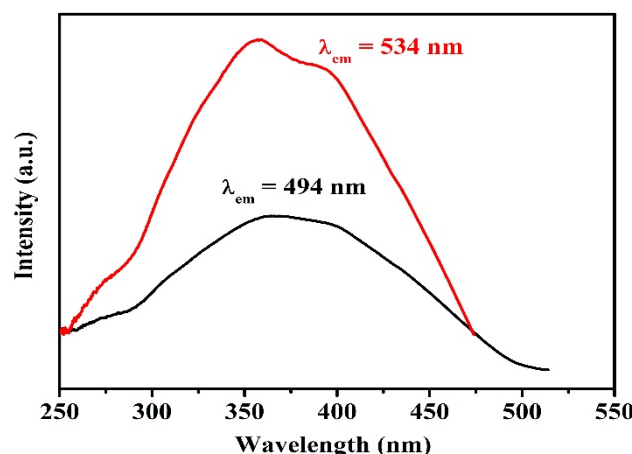

**Figure S1** Excitation spectra monitored at 494 and 534 nm of LSANO:0.01Eu<sup>2+</sup> sample.

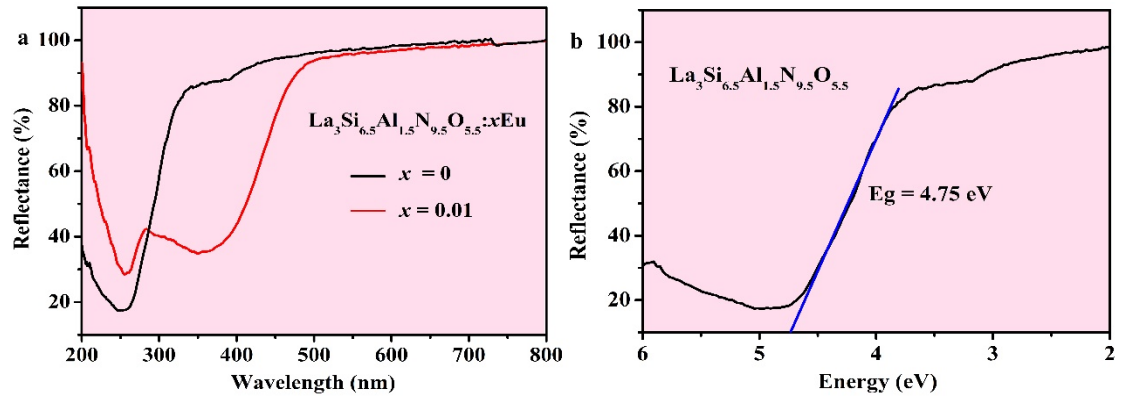

**Figure S2** (a) Diffuse reflectance spectra of Eu-doped and non-doped LSANO samples; (b) optical absorption edge of the LSANO.

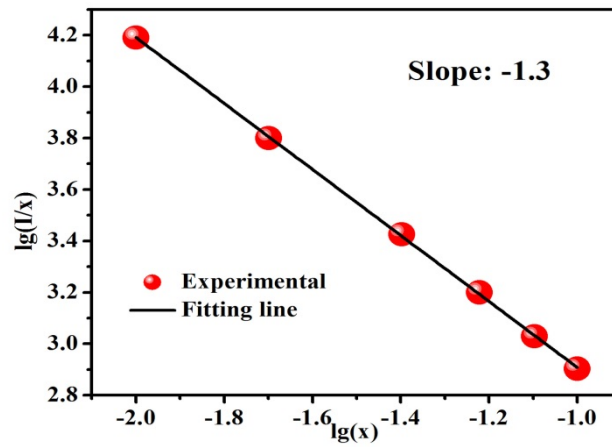

**Figure S3** Dependence of  $\text{Log}(I/x)$  versus  $\text{Log}(x)$  and the linear fitting (Here, the luminescence intensity  $I$  is integral intensity).

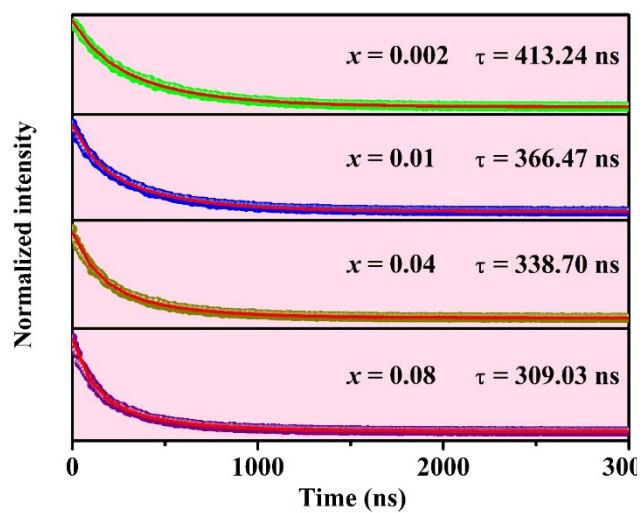

**Figure S4** PL decay curves of LSANO: $x\text{Eu}^{2+}$  ( $x = 0.002, 0.01, 0.04$  and  $0.08$ ) phosphors.

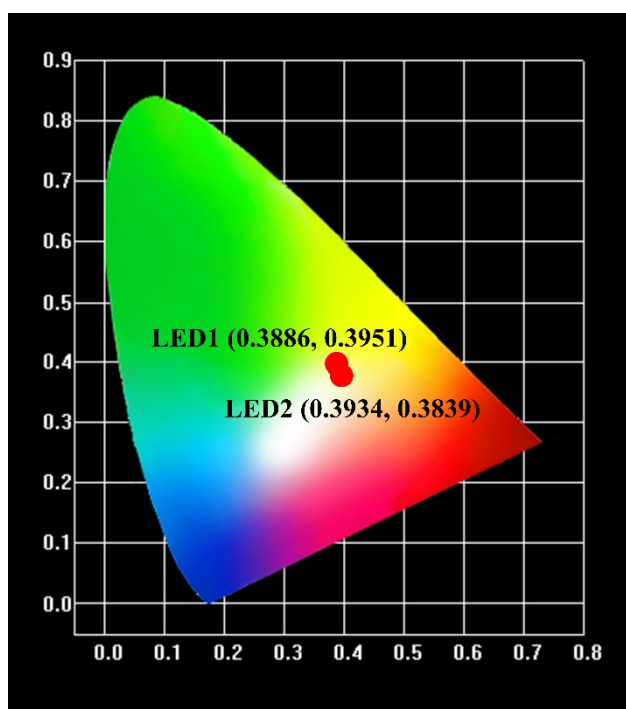

**Figure S5** Chromaticity coordinates of the white LEDs in the CIE chromaticity diagram.

## Tables

**Table S1** Significant parameters of LSANO:0.01Eu<sup>2+</sup>

| Crystallographic data of LSANO:0.01Eu <sup>2+</sup> |            |
|-----------------------------------------------------|------------|
| $2\theta$ range/deg.                                | 10 – 80    |
| $T/K$                                               | 298        |
| symmetry                                            | monoclinic |
| space group                                         | I2/a       |
| $a/\text{\AA}$                                      | 15.862     |
| $b/\text{\AA}$                                      | 4.914      |
| $c/\text{\AA}$                                      | 18.074     |
| $\alpha/\text{deg.}$                                | 90°        |
| $\beta/\text{deg.}$                                 | 115.043°   |
| $\gamma/\text{deg.}$                                | 90°        |
| Volume/ $\text{\AA}^3$                              | 1276.391   |
| $R_p/\%$                                            | 4.32       |
| $R_{wp}/\%$                                         | 5.26       |
| $\chi^2$                                            | 2.332      |

**Measurements and characterization:** The phases of samples were identified using powder X-ray diffraction (XRD) analysis (Bruker AXS D8), with graphite monochromatized Cu K $\alpha$  radiation ( $\lambda = 0.15405$  nm) operating at 40 kV and 40 mA. The scanning rate was  $10^\circ \text{min}^{-1}$  with a step size of  $0.02^\circ$ . The morphology and chemical composition of the powders was investigated by field emission scanning electron microscopy (SEM) equipped with an energy-dispersive (EDS) spectrometer (S-4800, Hitachi, Japan). Transmission electron microscopy (TEM) was taken on a FEI Tecnai G2S-Twin with a field-emission gun operating at 200 kV. X-ray photoelectron spectroscopy (XPS) spectra were obtained from a VG ESCALABMK II electron spectrometer. PLE and PL spectra were measured at room temperature by a Hitachi F7000 spectrophotometer equipped with a 150 W xenon lamp under a working voltage of 400 V, with a spectral slit width of 2.5 nm. The diffuse-reflectance spectra were measured by a Hitachi U-4100 spectrophotometer. The PL decay curves were detected by a Lecroy Wave Runner 6100 digital oscilloscope (1 GHz) using a tunable laser (pulse width = 4 ns, gate = 50 ns) as the excitation source (Continuum Sunlite OPO). The temperature-dependent luminescence spectra were measured in the range of 7 – 475 K with a fluorescence spectrophotometer, using a 450 W Xe lamp as an excitation source (Edinburgh Instruments FLSP-920) with a temperature controller.
